# Supplementary material
Source: PubMed Central journal article supplement (PMC2937974)
Supplement: supp_M110.155325_jbc.M110.155325-1.pdf [file supp_M110.155325_jbc.M110.155325-1.pdf]

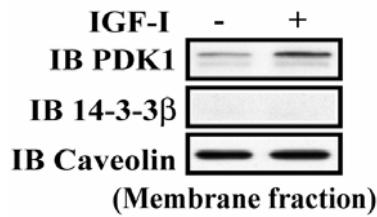

**Supplemental Fig. 1 IGF-I induced PDK1 membrane localization in nontransfected SMC.** Membrane proteins were isolated as described in *Experimental procedures* and immunoblotted with anti-PDK1. The blots were stripped and reprobed with anti-caveolin as a membrane fraction marker and anti-14-3-3β as a cytoplasmic fraction marker.

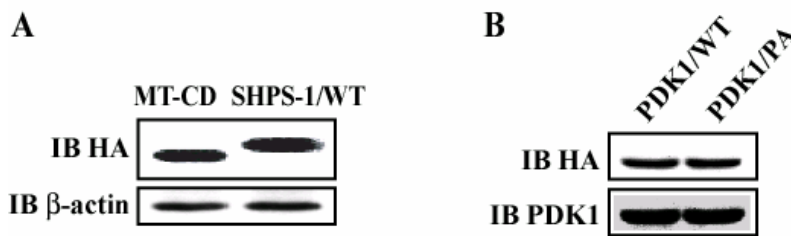

**Supplemental Fig. 2 (A)** SMCs expressing HA tagged SHPS-1/WT (SHPS-1/WT) and SHPS-1/CD (MT-CD) were lysed. The blot was probed with an anti-HA antibody to detect SHPS-1. It was stripped and reprobed with anti-β-actin as a loading control. **(B)** SMCs expressing PDK1/WT or PDK1/PA were lysed. The blots were probed with an anti-HA or anti-PDK1 to detect expression of PDK1/WT or PDK1/PA.

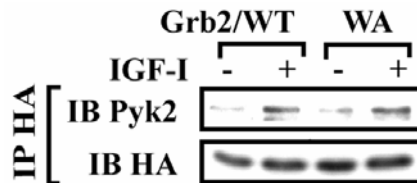

**Supplemental Fig. 3** Quiescent Grb2/WT or Grb2/WA expressing SMCs were stimulated with IGF-I. Cell lysates were immunoprecipitated (IP) with anti-HA and immunoblotted (IB) for Pyk2. To control the loading, the blot was stripped and reprobed with anti-HA.

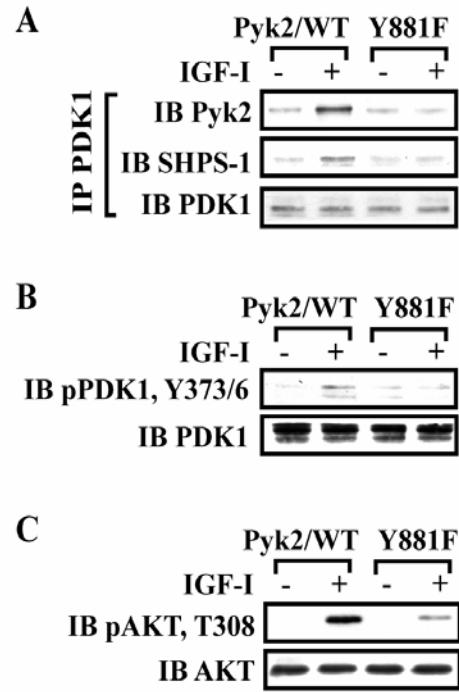

**Supplemental Fig. 4 (A)** Quiescent Pyk2/WT or Pyk2/Y881F-expressing SMCs were stimulated with IGF-I. Cell lysates were immunoprecipitated (IP) with anti-PDK1 and immunoblotted (IB) for the protein of interest. To control the loading, the blots were stripped and reprobed with anti-PDK1. **(B & C)** Twenty micrograms of cell lysate from the same experiment was used for detection of **(B)** phospho-PDK1 (Y373/6) **(C)** phospho-AKT (T308). The blots were stripped and reprobed with anti-PDK1 or anti-AKT as loading controls.
